# Supplementary material for: Development of a disease-based hospital-level diagnostic intensity index
Source: publisher site journal article supplement (doi:10.1515/dx-2023-0184), 2024-04-21

Supplement Figure 1 - Mosaic Plots of Diagnostic Intensity Index and External Validation Quartiles


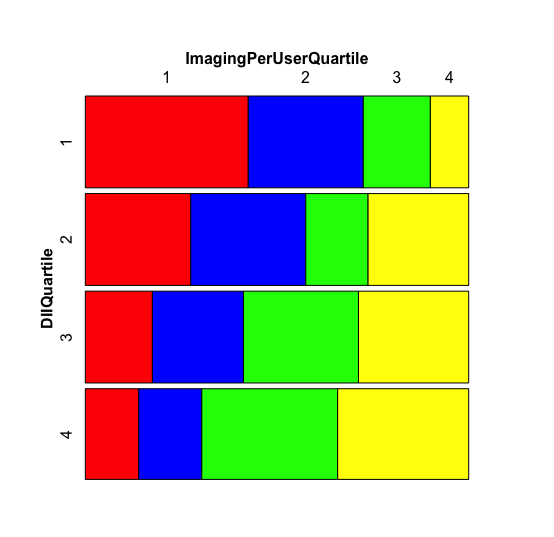

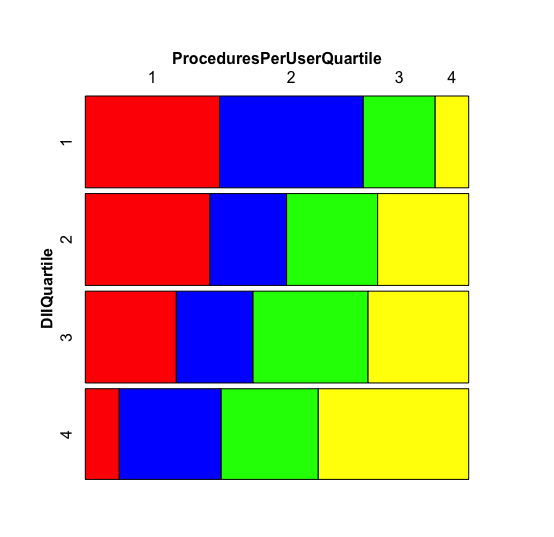

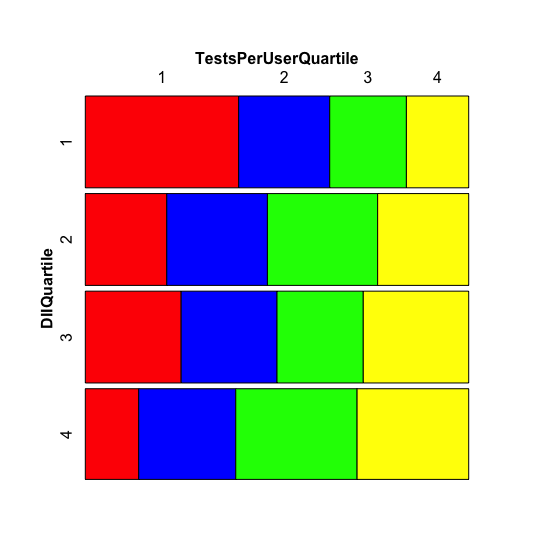

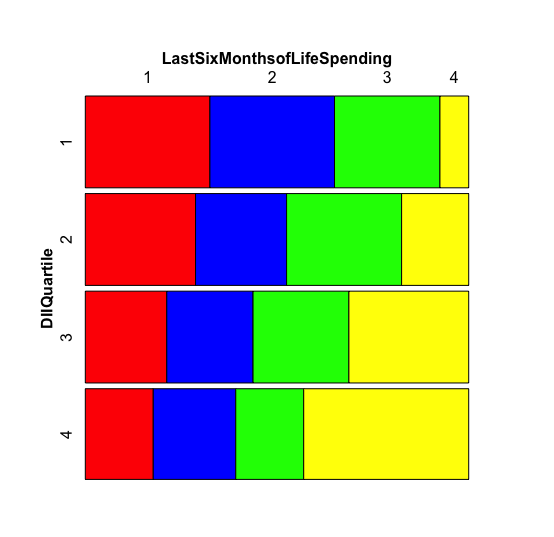

Supplement: Supplementary file 1 [file j_dx-2023-0184_suppl_001.docx]
