# Supplementary material for: Development of a disease-based hospital-level diagnostic intensity index
Source: publisher site journal article supplement (doi:10.1515/dx-2023-0184), 2024-04-21
Supplement: Supplementary file 1 [file j_dx-2023-0184_suppl_004.docx]

| **Supplement Table 3 - Acute care hospitals per county and HAS.** | | |
| --- | --- | --- |
|  |  |  |
| **Number of hospitals in county** | **Frequency** | **Percent** |
| 1 | 152 | 77 |
| 2 | 20 | 87 |
| 3 | 8 | 91 |
| 4 | 6 | 94 |
| 5 | 3 | 95 |
| 6 | 5 | 98 |
| 7 | 2 | 99 |
| 8 | 1 | 99 |
| 12 | 1 | 100 |
|  |  |  |
|  |  |  |
| ***Number of hospitals in HSA*** | ***Frequency*** | ***Percent*** |
| 1 | 207 | 86 |
| 2 | 21 | 94 |
| 3 | 5 | 96 |
| 4 | 4 | 98 |
| 5 | 2 | 99 |
| 6 | 1 | 99 |
| 8 | 1 | 100 |
| 15 | 1 | 100 |

The majority of counties and Hospital Service Areas contain only one acute care hospital. HSA – Hospital Service Area.
